# Supplementary material
Source: publisher figshare collection journal article supplement (https://acs.figshare.com/ndownloader/files/5400779)
Supplement: Supplementary file 1 [file 5400779]

# SUPPORTING INFORMATION

## Speciation of Gold Nanoparticles by ex-situ EXAFS†

Marco Giorgetti<sup>1\*</sup>, Giuliana Aquilanti<sup>2</sup>, Barbara Ballarin<sup>1</sup>, Mario Berrettoni<sup>1</sup>, Maria Cristina Cassani<sup>1</sup>, Silvia Fazzini<sup>1</sup>, Daniele Nanni<sup>1</sup>, Domenica Tonelli<sup>1</sup>

<sup>1</sup> *Department of Industrial Chemistry "Toso Montanari", University of Bologna, Viale del Risorgimento 4, 40136 Bologna, Italy.*

<sup>2</sup> *Elettra - Sincrotrone Trieste S.C.p.A., s.s. 14 km 163.5, 34149 Basovizza, Trieste, Italy.*

\* *marco.giorgetti@unibo.it. Phone: +39 051 2093 666; Fax: +39 051 2093 690.*

| Table of content                                                 | page |
|------------------------------------------------------------------|------|
| EXAFS fitting data for KAuCl <sub>4</sub> and HAuCl <sub>4</sub> | S2   |
| Examples of CONTOUR plot for HAuCl <sub>4</sub>                  | S2   |
| Tests of the EXAFS fitting data for HAuCl <sub>4</sub>           | S3   |
| EXAFS best fit of Au foil at the Au L <sub>III</sub> -edge       | S3   |
| Details of the EXAFS analysis for samples 1, 3, 6                | S4   |
| EXAFS fit for sample S5 using the two structural models          | S4   |
| EXAFS test result for sample S4 using the "dimer" model          | S5   |

**Table S1.** Atomic first shell distance, coordination number (CN) and corresponding EXAFS Debye-Waller factor of the Au(III) reference materials: KAuCl<sub>4</sub> and a 5mM HAuCl<sub>4</sub> aqueous solution.

| Sample                                                   | HAuCl <sub>4</sub><br>5 mM | KAuCl <sub>4</sub><br>solid |
|----------------------------------------------------------|----------------------------|-----------------------------|
| <b>Au-Cl /Å</b>                                          | 2.29(1)                    | 2.286(4)                    |
| <b><math>\sigma^2/\text{\AA}^2</math></b>                | 0.0025(10)                 | 0.0022(5)                   |
| <b>CN</b>                                                | 4                          | 4                           |
| <b><math>\theta_1</math> Cl-Au-Cl /degree</b>            | 180 FIX                    | 180 FIX                     |
| <b><math>\sigma^2_\theta</math> / degree<sup>2</sup></b> | 41(10)                     | 40(10)                      |
| <b><math>E_0</math> / eV</b>                             | 11929(1)                   | 11929(1)                    |
| <b><math>S_0^2</math></b>                                | 0.91                       | 0.91                        |

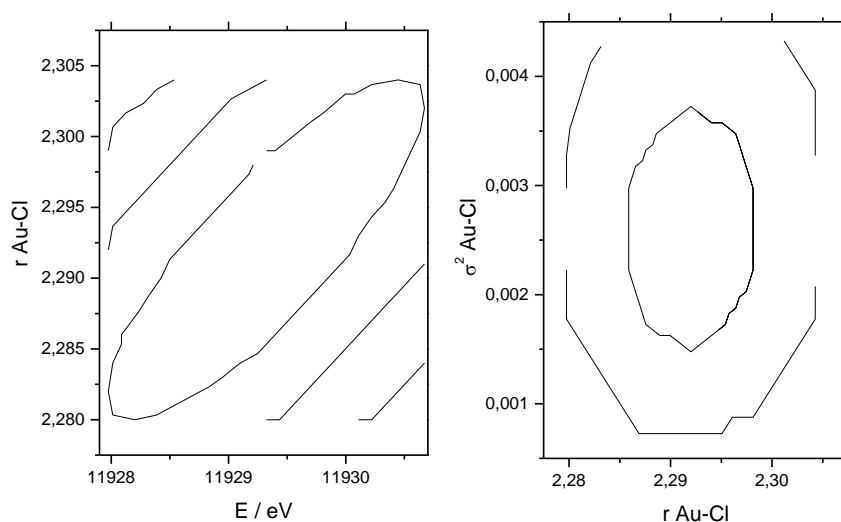

**Fig. S1.** Examples of CONTOUR plot for HAuCl<sub>4</sub> for the error parameters determination. These plots were selected among the parameters having strongest correlation to reflect the highest error. The estimated statistical error is associated with the 95% confidence interval.

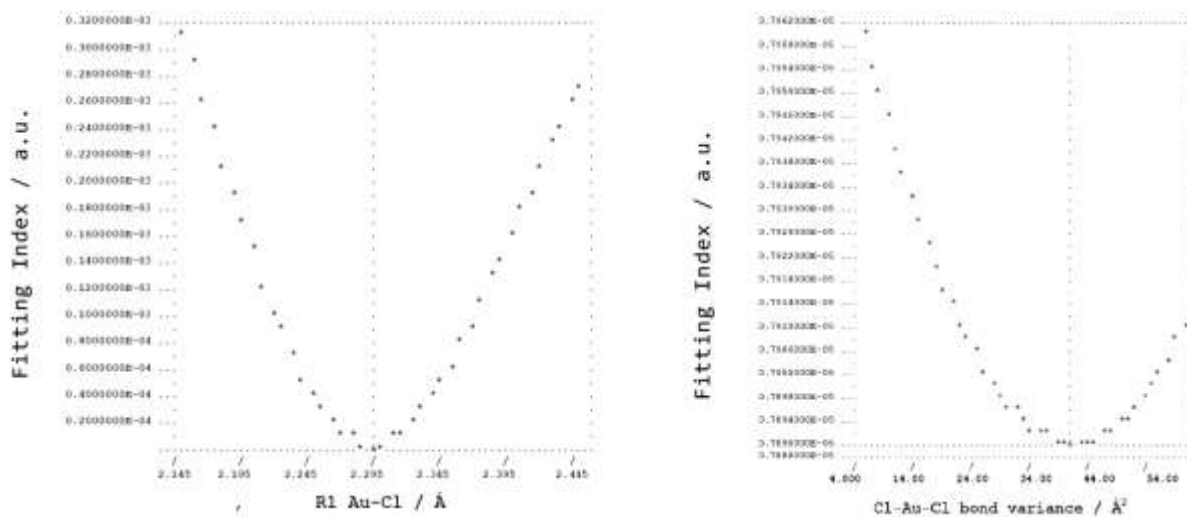

**Fig. S2.** Tests of the EXAFS fitting data for  $\text{HAuCl}_4$ . The figure displays the fitting index values (to be minimized during the fitting procedure) as a function of the Au-Cl distance (left) and of Cl-Au-Cl bond variance (right). The test have been obtained during a scan where all the other parameters were kept fixed to their optimized values. It is evident, for instance, the region of minima which identify the Au-Cl interactions 2.29 Å

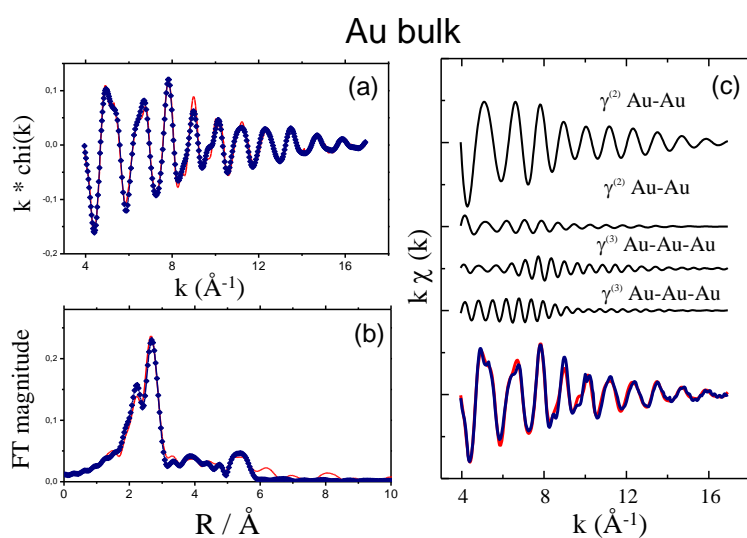

**Fig. S3** Best fit of the Au  $L_{\text{III}}$ -edge EXAFS signals of Au foil (panel a) and the corresponding Fourier Transform (panel b). The figure shows the comparison of the experimental (—) and theoretical (...) k-extracted EXAFS signals. In the panel c, the details of the EXAFS analysis are shown, displaying the individual EXAFS contributions, in terms of two-body and three-body signals, to the total theoretical signal.

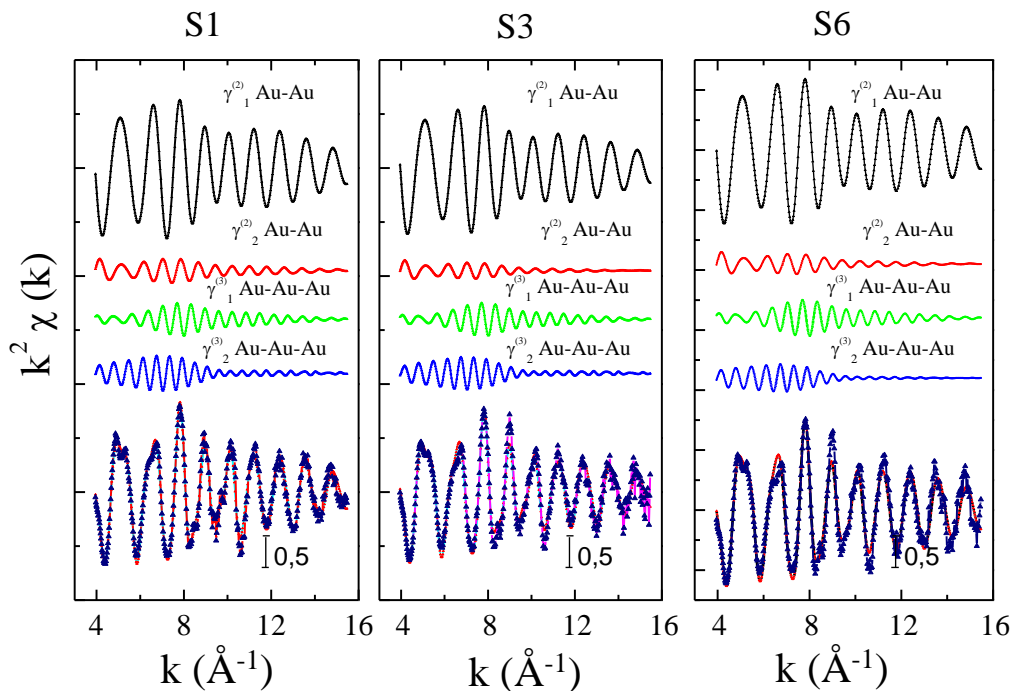

**Fig. S4.** Details of the EXAFS analysis of the Au LIII-edge of fully reduced samples S1, S3 and S6. The figure shows the individual EXAFS contributions, in terms of two-body and three-body signals, to the total theoretical signal. The comparison of the total theoretical signal (...) with the experimental one (-) is also reported.

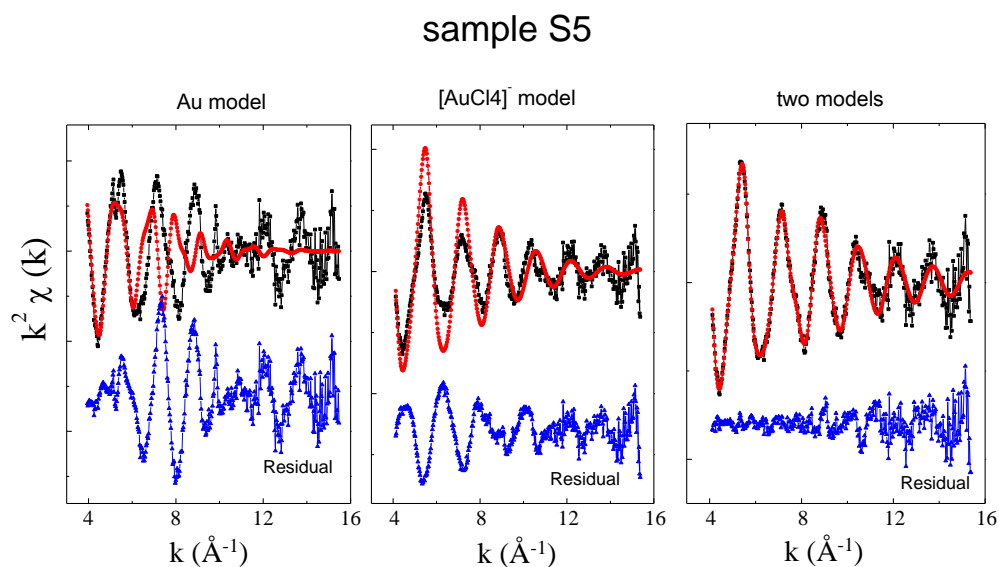

**Fig. S5** Test of the EXAFS fitting procedure for sample S5 using the two selected (precursor and Au) structural models, and the combination of the two, as suggested by the LCF XANES analysis. Each panel of the Figure shows the comparison of the experimental (black curve) and theoretical (bred) and the residual (blue) at the bottom of each panel. The residual curve is rather large while the analysis has been conduced using exclusively one model (Au or AuCl4-). On the contrary, the residual curve is characterized by statistical noise in the "two models" fit (the progressive increase of the residual curve as a function of K its due to the  $K^2$  weighted function)

sample S4 - [Cl<sub>3</sub>Au-AuCl<sub>3</sub>] model

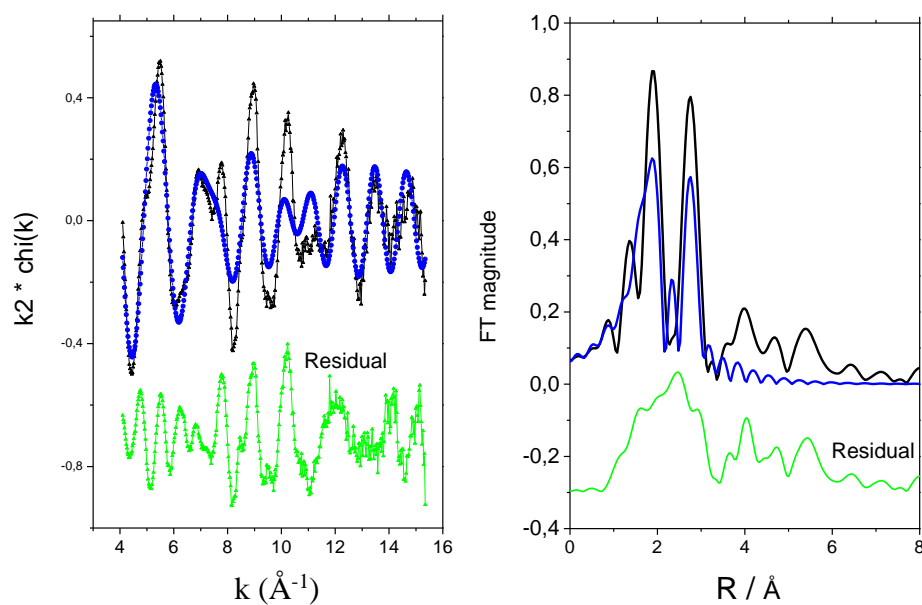

**Fig. S6** Test of the EXAFS fitting procedure for sample S4 using the dimer structural model (left) and the corresponding Fourier Transform (right). The figure shows the comparison of the experimental (black curve) and theoretical (blue) and the residual (green) at the bottom of each panel. The residual curve of EXAFS is most likely due to a multiple scattering contribution (triplet of Au atoms) which is not present in the dimer model.
